# Supplementary material for: Nutritional Strategies for the Individualized Treatment of Non-Alcoholic Fatty Liver Disease (NAFLD) Based on the Nutrient-Induced Insulin Output Ratio (NIOR)
Source: PubMed Central journal article supplement (PMC4964561; doi:10.3390/ijms17071192), 2016-07-22
Supplement: ijms-17-01192-s001.pdf [file ijms-17-01192-s001.pdf]

## Supplementary Materials: Nutritional Strategies for the Individualized Treatment of Non-Alcoholic Fatty Liver Disease (NAFLD) Based on the Nutrient-Induced Insulin Output Ratio (NIOR)

Ewa Stachowska, Karina Ryterska, Dominika Maciejewska, Marcin Banaszczak, Piotr Milkiewicz, Małgorzata Milkiewicz, Izabela Gutowska, Piotr Ossowski, Małgorzata Kaczorowska, Dominika Jamioł-Milc, Anna Sabinicz, Małgorzata Napierała, Lidia Wądołowska and Joanna Raszeja-Wyszomirska

**Table S1.** Changes in anthropological and biochemical blood parameters in Model 2. <sup>a</sup>  $p < 0.0005$  Wilcoxon test; <sup>b</sup>  $p < 0.005$  Wilcoxon test; <sup>#</sup> NIOR (+) consistent vs. contrary diets NIOR (-)/Cust (-). Mann-Whitney *U* test.

| Parameters                    | Baseline                   |                            |                             | 24W                        |                             |                             | <i>p</i> Value                                       |
|-------------------------------|----------------------------|----------------------------|-----------------------------|----------------------------|-----------------------------|-----------------------------|------------------------------------------------------|
|                               | CUST (+)                   | NOR (+)                    | CONTRA CUST (-) and NOR (-) | CUST (+)                   | NOR (+)                     | CONTRA CUST (-) and NOR (-) |                                                      |
| Age                           | 49.95 ± 12.32              | 47.90 ± 11.72              | 47.82 ± 13.08               | 49.95 ± 12.32              | 47.90 ± 11.72               | 47.82 ± 13.08               |                                                      |
| Body mass (kg)                | 92.27 ± 23.44 <sup>a</sup> | 86.99 ± 15.76 <sup>a</sup> | 83.89 ± 16.13 <sup>a</sup>  | 80.36 ± 14.22 <sup>a</sup> | 79.62 ± 13.12 <sup>a</sup>  | 77.99 ± 13.51 <sup>a</sup>  | <sup>a</sup> $p < 0.0005$                            |
| BMI (kg/m <sup>2</sup> )      | 30.51 ± 5.58 <sup>a</sup>  | 29.00 ± 3.94 <sup>a</sup>  | 27.54 ± 3.99 <sup>a</sup>   | 26.47 ± 3.15 <sup>a</sup>  | 26.28 ± 2.79 <sup>a,#</sup> | 25.58 ± 2.74 <sup>a,#</sup> | <sup>a</sup> $p < 0.0005$<br><sup>#</sup> $p < 0.04$ |
| Arm circumference (cm)        | 32.16 ± 4.1                | 30.83 ± 3.24               | 30.19 ± 3.91                | 30.44 ± 2.91               | 29.49 ± 2.94                | 30.19 ± 4.41                |                                                      |
| Waist circumference (cm)      | 101.01 ± 15.44             | 98.01 ± 10.96              | 97.13 ± 11.00               | 85.42 ± 26.73              | 89.87 ± 10.04               | 89.83 ± 9.01                |                                                      |
| Hip circumference (cm)        | 103.16 ± 10.23             | 105.66 ± 6.87              | 101.02 ± 7.09               | 101.66 ± 8.02              | 101.26 ± 5.18               | 97.50 ± 5.90                |                                                      |
| Fat mass (%)                  | 32.66 ± 11.52              | 31.29 ± 10.02              | 26.46 ± 6.8                 | 25.46 ± 7.37               | 25.7 ± 6.40                 | 24.36 ± 4.14                |                                                      |
| Fat content (%)               | 34.96 ± 5.96               | 36.1 ± 8.17                | 31.29 ± 2.93                | 31.58 ± 5.06               | 32.34 ± 5.21                | 31.63 ± 3.22                |                                                      |
| Lean mass (%)                 | 59.63 ± 13.64              | 55.22 ± 11.02              | 57.40 ± 9.98                | 54.89 ± 9.58               | 51.97 ± 11.90               | 53.21 ± 10.19               |                                                      |
| AST (U/L)                     | 27.73 ± 9.56               | 25.86 ± 8.74               | 44.33 ± 29.24               | 21.50 ± 4.94               | 20.20 ± 6.29                | 51.25 ± 94.91               |                                                      |
| ALT (U/L)                     | 44.71 ± 22.40 <sup>b</sup> | 44.60 ± 24.95 <sup>b</sup> | 64.33 ± 44.08 <sup>b</sup>  | 30.21 ± 14.20 <sup>b</sup> | 26.93 ± 18.18 <sup>b</sup>  | 42.33 ± 39.94 <sup>b</sup>  | <sup>b</sup> $p < 0.005$                             |
| Triglycerides (mg/dL)         | 123.50 ± 43.01             | 122.73 ± 56.95             | 143.00 ± 108.07             | 98.50 ± 49.14              | 134.06 ± 113.18             | 156.17 ± 99.73              |                                                      |
| HDL (mg/dL)                   | 47.57 ± 11.83              | 53.40 ± 13.34              | 53.33 ± 26.90               | 52.71 ± 15.26              | 52.00 ± 14.30               | 54.58 ± 20.09               |                                                      |
| Insulin (mcU/L)               | 12.56 ± 14.99              | 11.62 ± 10.42              | 11.45 ± 6.75                | 7.96 ± 7.60                | 6.193 ± 6.162               | 6.19 ± 4.03                 |                                                      |
| HomaIR                        | 3.57 ± 5.90                | 3.01 ± 2.87 <sup>b</sup>   | 2.84 ± 1.71                 | 2.04 ± 2.02                | 1.55 ± 1.60 <sup>b</sup>    | 1.52 ± 1.03                 | <sup>b</sup> $p < 0.005$                             |
| Hyaluronic Acid (U/L)         | 56.43 ± 22.40              | 51.28 ± 27.76 <sup>b</sup> | 42.64 ± 19.98               | 38.91 ± 11.74              | 31.66 ± 16.44 <sup>b</sup>  | 36.69 ± 14.33               | <sup>b</sup> $p < 0.005$                             |
| Fatty liver (Hamaguchi score) | 2.38 ± 1.47                | 2.52 ± 0.87                | 2.25 ± 0.84                 | 1.47 ± 0.92                | 1.33 ± 0.96 <sup>a,#</sup>  | 1.57 ± 1.03 <sup>a,#</sup>  | <sup>a</sup> $p < 0.0005$<br><sup>#</sup> $p < 0.04$ |
